# ***BRITE*-Constellation reveals evidence for pulsations in the enigmatic binary $\eta$ Carinae**

Noel D. Richardson,<sup>1\*</sup> Herbert Pablo,<sup>2</sup> Christiaan Sterken,<sup>3</sup> Andrzej Pigulski,<sup>4</sup> Gloria Koenigsberger,<sup>5</sup> Anthony F. J. Moffat,<sup>6</sup> Thomas I. Madura,<sup>7</sup> Kenji Hamaguchi,<sup>8,9</sup> Michael F. Corcoran,<sup>8,10</sup> Augusto Damineli,<sup>11</sup> Theodore R. Gull,<sup>12</sup> D. John Hillier,<sup>13</sup> Gerd Weigelt,<sup>14</sup> Gerald Handler,<sup>15</sup> Adam Popowicz,<sup>16</sup> Gregg A. Wade,<sup>17</sup> Werner W. Weiss<sup>18</sup> and Konstanze Zwintz<sup>19</sup>

<sup>1</sup>*Department of Physics and Astronomy, Ritter Observatory, The University of Toledo, Toledo, OH 43606-3390, USA*

<sup>2</sup>*AAVSO Headquarters, 49 Bay State Rd., Cambridge, MA 02138, USA*

<sup>3</sup>*Department of Physics, Vrije Universiteit Brussel, Pleinlaan 2, 1050 Brussels, Belgium*

<sup>4</sup>*Instytut Astronomiczny, Uniwersytet Wrocławski, Kopernika 11, 51-622, Wrocław, Poland*

<sup>5</sup>*Instituto de Ciencias Físicas, Universidad Nacional Autónoma de México, Ave. Universidad S/N, Cuernavaca, 62210, Morelos, México*

<sup>6</sup>*Département de physique and Centre de Recherche en Astrophysique du Québec (CRAQ), Université de Montréal, C.P. 6128, Succ. Centre-Ville, Montréal, Québec, H3C 3J7, Canada*

<sup>7</sup>*Department of Physics and Astronomy, San José State University, One Washington Square, San José, CA 95192-0106, USA*

<sup>8</sup>*CRESST II and X-ray Astrophysics Laboratory NASA/GSFC, Greenbelt, MD 20771, USA*

<sup>9</sup>*Department of Physics, University of Maryland, Baltimore County, 1000 Hilltop Circle, Baltimore, MD 21250, USA*

<sup>10</sup>*Department of Physics, Institute for Astrophysics and Computational Sciences, The Catholic University of America, Washington, DC 20064, USA*

<sup>11</sup>*Instituto de Astronomia, Geofísica e Ciências Atmosféricas, Universidade de São Paulo, Rua do Matão 1226, Cidade Universitária, São Paulo, 05508-900, Brazil*

<sup>12</sup>*Code 667, NASA Goddard Space Flight Center, Greenbelt, MD 20771, USA*

<sup>13</sup>*Department of Physics and Astronomy & Pittsburgh Particle Physics, Astrophysics, and Cosmology Center (PITT PACC), University of Pittsburgh, Pittsburgh, PA 15260, USA*

<sup>14</sup>*Max Planck Institute for Radio Astronomy, Auf dem Hügel 69, D-53121 Bonn, Germany*

<sup>15</sup>*Nicolaus Copernicus Astronomical Center, ul. Bartycka 18, 00-716, Warsaw, Poland*

<sup>16</sup>*Institute of Automatic Control, Silesian University of Technology, Akademicka 16, 44-100 Gliwice, Poland*

<sup>17</sup>*Department of Physics and Space Science, Royal Military College of Canada, PO Box 17000 Kingston, ON K7K 7B4, Canada*

<sup>18</sup>*Institute for Astrophysics, University of Vienna, Tuerkenschanzstrasse 17, 1180 Vienna, Austria*

<sup>19</sup>*Universität Innsbruck, Institut für Astro- und Teilchenphysik Technikerstrasse 25/8, A-6020 Innsbruck, Austria*

Accepted 2018 January 15. Received 2018 January 10; in original form 2017 November 6

## **ABSTRACT**

$\eta$  Car is a massive, eccentric binary with a rich observational history. We obtained the first high-cadence, high-precision light curves with the *BRITE*-Constellation nanosatellites over 6 months in 2016 and 6 months in 2017. The light curve is contaminated by several sources including the Homunculus nebula and neighbouring stars, including the eclipsing binary CPD  $-59^{\circ}2628$ . However, we found two coherent oscillations in the light curve. These may represent pulsations that are not yet understood but we postulate that they are related to tidally excited oscillations of  $\eta$  Car's primary star, and would be similar to those detected in lower mass eccentric binaries. In particular, one frequency was previously detected by van Genderen et al. and Sterken et al. through the time period of 1974–1995 through timing measurements of photometric maxima. Thus, this frequency seems to have been detected for nearly four decades, indicating that it has been stable in frequency over this time span. These pulsations could help provide the first direct constraints on the fundamental parameters of the primary star if confirmed and refined with future observations.

**Key words:** binaries: close – stars: early-type – stars: individual:  $\eta$  Car, CPD  $-59^{\circ}2628$  – stars: oscillations – stars: winds, outflows.

\* E-mail: [noel.richardson@UToledo.edu](mailto:noel.richardson@UToledo.edu)

## 1 INTRODUCTION

Most massive stars are found in binary systems, with a majority of these binaries experiencing interactions during the stellar lifetimes (Sana et al. 2012). One of the most enigmatic binaries in the Galaxy is  $\eta$  Carinae, which has a massive luminous blue variable (LBV) primary star. The secondary star has eluded observers since the discovery of the 5.54 yr periodicity by Daminieli (1996) but some properties have been inferred through X-ray analyses of the colliding winds (e.g. Corcoran et al. 2001, 2017). The rapid changes in the spectrum that occur every 5.54 yr are caused by energetic phenomena that occur at the periastron passage of a highly eccentric system ( $e \sim 0.9$ ; see Daminieli et al. 2008; Teodoro et al. 2016). Some recent observations indicate that there may be long-term changes present within the system (e.g. Mehner et al. 2010b, 2012).

$\eta$  Car is one of the most studied objects in the sky. Photometric observations can be traced before the Great Eruption, which occurred in 1843 (e.g. Humphreys & Davidson 1994; Smith & Frew 2011), when the system expelled many solar masses of material to create the bipolar Homunculus nebula that surrounds the system today. After dust began to form and the Great Eruption ended, the system faded to below naked eye visibility except for a brief brightening due to a second, smaller eruption in the 1890s. Since then, the system has been slowly growing in brightness as the dust dissipates, and is currently at a  $V$ -band magnitude near 4.2. There are excursions in the brightness observed when the stars are near periastron, as reported by Whitelock et al. (2004) and Fernández-Lajús et al. (2010).

This photometric variability near periastron could have several causes. Madura & Owocki (2010) postulated that this signature was caused by the wind–wind collision region carving a hole in the primary’s dense wind pseudo-photosphere during periastron passage, allowing radiation from the inner layers to escape more easily. However, brightening due to tidal shear energy dissipation around periastron passage has been postulated to cause periastron events by Moreno, Koenigsberger & Harrington (2011). Indeed, the eclipse-like event in the light curve occurring near periastron (see Fernández-Lajús et al. 2010) also bears a striking similarity to the heartbeat phenomenon discovered in eccentric binaries with the *Kepler* Space Telescope (Thompson et al. 2012) and which is caused by tidal effects.

The heartbeat phenomenon occurs in close eccentric binaries where the changes in the gravitational potential introduce strong perturbations in the tidal amplitude and configuration. While *Kepler* only observed this phenomenon in stars with masses up to about twice the mass of the Sun, it has recently been discovered in the eccentric OB system  $\iota$  Orionis ( $P = 29.13376$  d,  $e = 0.764$ ,  $M_1 = 23.2 M_\odot$ ) by Pablo et al. (2017) with the *BRITE* (*BR*ight *T*arget *E*xplorer)-Constellation nanosatellites and was predicted to be present by Moreno & Koenigsberger (1999). Other massive stars may also show this phenomenon, and with the large data sets being collected by *BRITE*-Constellation and the *K2* missions, more will likely be discovered in the near future.

In addition to the tidal distortion of the stars near periastron, heartbeat systems exhibit pulsational behaviour that is driven by the binary orbit and the changing tidal forces during the orbit. These pulsations occur at resonant harmonics of the orbital period (Kumar, Ao & Quataert 1995; Welsh et al. 2011). Analysis of these tidally induced pulsations can help constrain masses, radii, and fundamental parameters even without precise radial velocities or photometric eclipses. After Daminieli, Conti & Lopes (1997) proposed a binary orbit as an explanation for spectroscopic events in  $\eta$  Car, Davidson

(1997) noted that the eccentricity must be very high to fit an orbit. In such a case, Davidson (1997) predicted that tidal forces would be important if  $e \gtrsim 0.85$ , which was also discussed again recently by Davidson, Ishibashi & Martin (2017).

In this paper, we report on observations of  $\eta$  Car obtained with *BRITE*-Constellation during the years 2016 and 2017 (Section 2). Section 3 shows how these observations are found to exhibit coherent variations at the millimag-level across the two 6-month duration time series.  $\eta$  Car lies in a crowded field, and we discuss the contaminants in the light curve in Section 4. We discuss the implications in Section 5 and the need for future work, both observationally and theoretically, in Section 6.

## 2 BRITE PHOTOMETRY

Precision time series photometry was collected for this project with *BRITE*-Constellation. This is a fleet of five nanosatellites described in detail by Weiss et al. (2014) and Pablo et al. (2016). The telescopes have 3 cm apertures, with two satellites recording blue images (3900–4600 Å) and three satellites recording red images (5500–7000 Å). The filters are similar to the Geneva  $B$  and Sloan  $r$  filters. The satellites’ field of view is large,  $20^\circ \times 24^\circ$ . Data are downloaded for over 30 stars simultaneously. The orbital periods of the fleet range between 97 and 101 min. The satellite images have large (28 arcsec) pixels on the CCDs, with an FWHM between 5 and 8 pixels, meaning that the light of  $\eta$  Car blurs into the light of the bipolar Homunculus nebula (with a size of 18 arcsec) during the observations. This dilution will dilute the strength of the any stellar variability with the contamination from the surrounding Homunculus nebula. The amount of this dilution remains unknown as no high-resolution imaging capable of separating the flux of the central source and the Homunculus nebula has been obtained recently. Further, the actual amplitude could be diluted intrinsically by the strong stellar wind.

A total of 57 127 data points were recorded with the *BRITE-Toronto* (BTr; red filter) satellite between 2016 February 10 and 2016 July 23 (phase 13.28–13.36 according to the ephemeris of Teodoro et al. 2016). The measurements were made with 4- or 5-s exposures for periods of 5–10 min per orbit when the field was visible. The chopping mode that was utilized allows us to perform photometry through a difference between successive frames with the star moving to different positions in the sub-raster. The resulting difference image yields a positive and negative stellar point spread function (PSF) with bad pixels and sky background subtracted. This technique increases data quality and precision (Popowicz 2016; Popowicz et al. 2017). Precision was further increased by creating a mean measurement for each satellite orbit of 98.24 min, resulting in an average 1.2 mmag rms precision for the differential photometry after removing correlations within the data, as described by Pablo et al. (2016). This resulted in a total of 1631 photometric points.

Similar observations of  $\eta$  Car were obtained in 2017 with both *BRITE-Heweliusz* (BHR) and *UniBRITE* (UBr), which also operate with a red filter identical to that on *BRITE-Toronto*. The resulting light curve from *UniBRITE* had 884 points binned on the satellite orbits taken between 2017 January 11 and 2017 May 4. 1056 points were obtained with *BRITE-Heweliusz* between 2017 March 30 and 2017 July 1. The reductions show identical variability in the time frame between 2017 March 30 and 2017 May 4 when both of these satellites observed the source. The second year of observations shows typical errors of 2.2–2.5 mmag per orbit-binned data point, owing to the shorter exposures being necessary with these two satellites.

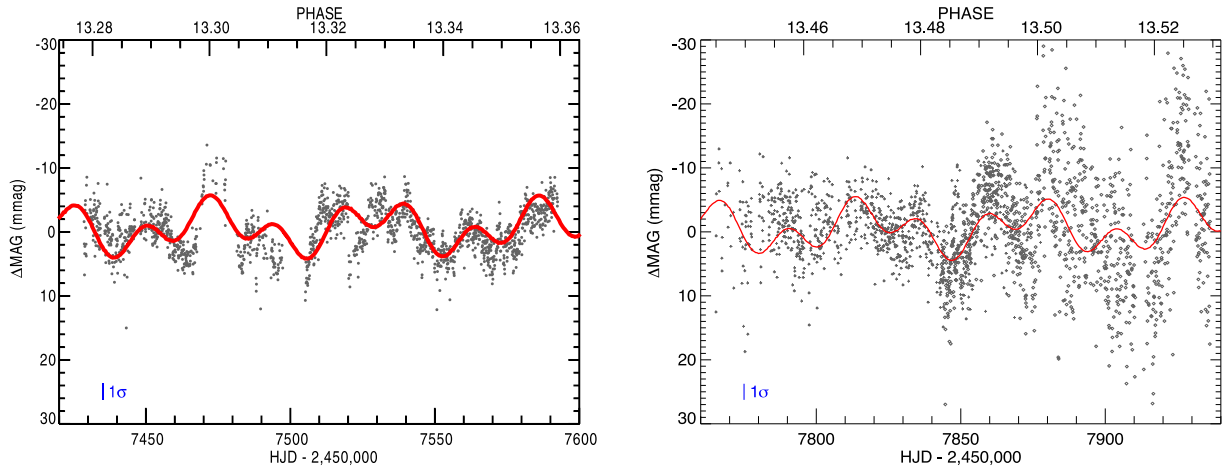

**Figure 1.** The light curves observed by *BRITE* in 2016 (left) and 2017 (right). The data points are solid circles ( $\bullet$ ; BTr), plus signs ( $+$ ; UBr), and open diamonds ( $\diamond$ ; BHR) with the two-frequency fit shown in red. Each panel shows 180 d of time on the abscissa, with nearly 180 d between the two panels. A typical 2 mmag error bar ( $1\sigma$ ) is shown in the lower left part of the panels.

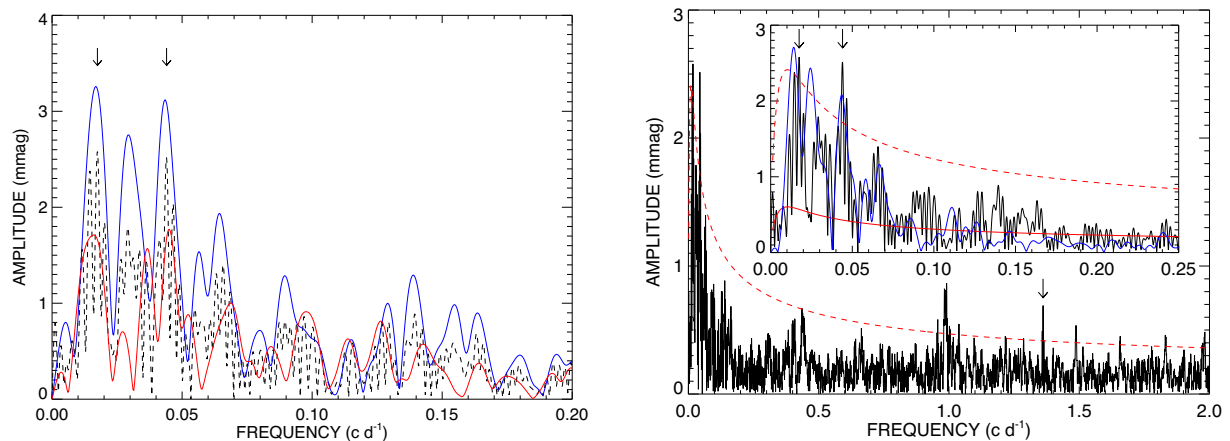

**Figure 2.** Fourier amplitude spectrum of the photometric data. On the left, we show the Fourier spectrum of the 2016 data (blue solid line), the 2017 data (red solid line), and the combined data set (black dashed line). Unsurprisingly, the combined data set provides similar peaks to the peaks from the individual seasons. In the right-hand panel, we show the Fourier amplitude spectrum of the combined data set, and indicate the frequency that represents a harmonic of the orbital period of CPD  $-59^{\circ}2628$ . In the inset plot, we show the noise floor in red, along with a  $4\sigma$  detection threshold in a dashed red line. The two periods from Table 1 are indicated. In blue, we show a Fourier amplitude spectrum of the TIDES model discussed in the text.

There are many ways to obtain a reduced light curve from *BRITE*-Constellation, as many different correlations can exist within the measurements. This is discussed by Pablo et al. (2016). Given the unusual nature of the LBV primary, we elected to do the minimal amount of detrending within the data, to better retain longer period intrinsic variability inherent to the LBV-like object. As no ground-based long-term photometric monitoring was collected in parallel to these observations, we cannot check for consistency and accuracy in the final light curve as long-term changes are present in LBVs. This may result in derived peaks from the Fourier transformations having inaccurate amplitudes.

### 3 VARIABILITY FOUND THROUGH FOURIER TRANSFORMATION

The *BRITE*-Constellation light curves are plotted in Fig. 1 as a function of both time and orbital phase. The phase was calculated using the ephemeris of Teodoro et al. (2016), which represents the predicted periastron passage from the binary models. The leading number 13 is in reference to the first-observed ‘low-ionization’

event, which would be relative to the periastron passage that was observed in 1942 and reported by Gaviola (1953). The variability is clearly seen to be at a higher amplitude than the errors of the individual points, so we began our analysis by using the `PERIOD04` software (Lenz & Breger 2005) to calculate the amplitude of the Fourier transform of the data, shown in Fig. 2. Each frequency is of the form  $A_i \sin(2\pi(\omega t + \phi_i))$ , where  $A_i$  is the amplitude,  $\omega$  is the angular frequency, and  $\phi$  is the offset phase. These frequencies can be improved upon after fitting other peaks in the Fourier transform. Our values of  $\phi$  are based on the zero-point of the HJD times. This approach allows the user to fit the selected peak in the Fourier amplitude spectrum and remove it from the data set. Through an iterative process, we then infer multiple frequencies from the light curve, their amplitudes, and phase information. We continued this process of successive pre-whitening until the remaining Fourier peaks were near the noise floor and were not statistically significant. There is a small peak at 1 cycle  $d^{-1}$ , which is caused by the daily changes in terrestrial illumination as the satellites orbit the Earth.

Also shown in Fig. 2 is the noise floor for the Fourier amplitude spectrum, similar to that described by Pablo et al. (2017). The noise

**Table 1.** Derived frequencies.

|       | Frequency<br>(cycles d <sup>-1</sup> ) | Period<br>(d) | Amplitude<br>(mmag) | Phase | S/N  | Potential<br>harmonics |
|-------|----------------------------------------|---------------|---------------------|-------|------|------------------------|
| $f_1$ | 0.0174(5)                              | 58.8          | 2.64                | 0.551 | 4.52 | 34–36                  |
| $f_2$ | 0.0440(5)                              | 22.7          | 2.47                | 0.042 | 5.86 | 87–91                  |

floor represents the level at which no reliable signal is fit. It also neglects any contribution from the actual periods that are present in the data, so may be over-estimated at the low-frequency end. To calculate the noise present in the Fourier transform, we used a procedure outlined by Pablo et al. (2017) and based upon that of Gabriel et al. (2002). We use Gaussian statistics to define a false alarm probability (FAP) in a series of  $N$  frequency bins, where a peak would be  $m\times$  above the noise. Then,

$$\text{FAP}_N(m) = 1 - (1 - e^{-m})^{pN}.$$

Here,  $p$  is set equal to 2.8 and represents an empirical term necessary because we oversample the Fourier transform. In order to calculate a significance threshold, we choose a value of FAP = 0.05 per cent. This is shown as a solid red line in the right, inlaid panel of Fig. 2. We also plot a dashed red line, which is four times this level of significance in the right panel of Fig. 2. The two derived significant frequencies are listed in Table 1, along with their corresponding periods and amplitudes. The signal to noise of the peaks is about  $4\times$  the noise floor. These values of significance may be higher as the noise floor will be overestimated for these low frequencies as it was calculated prior to the removal of the two frequencies. With additional data taken by *BRITE*-Constellation in the future, the significance of these peaks should increase.

#### 4 CONTAMINATION WITHIN THE LIGHT CURVE

$\eta$  Car is a member of the young cluster Trumpler 16 and lies in a crowded region of the Carina nebula. While most of the neighbouring stars or objects do not emit any detectable light in the optical, the Homunculus nebula and seven stars or stellar systems are all brighter than  $V = 10$ . All of these stars have a spectral type listed in SIMBAD of O.

The causes of O-star photometric variability are many and not always simple to identify. Ramiamanantsoa et al. (2014) found that the mid-O star  $\xi$  Per exhibited photometric behaviour attributed to spots on the stellar surface that may drive the discrete absorption component phenomenon often observed in O stars (e.g. Kaper et al. 1996). Similar phenomena were recently confirmed with both photometry and spectroscopy for the early-O supergiant  $\zeta$  Puppis (Ramiamanantsoa et al. 2018). The late-O supergiant  $\zeta$  Orionis (Buysschaert et al. 2017) shows both a rotational modulation from its magnetic field and a secondary component that varies on a longer time-scale and may be associated with the stellar wind.

The comparison stars used in ground-based photometric monitoring of  $\eta$  Car (van Genderen et al. 1995; Sterken, de Groot & van Genderen 1996; van Genderen et al. 1999) included HDE 303308 (O3V), CPD  $-59^\circ 2632$  (B1V), and CPD  $-59^\circ 2627$  (O8.5V). While all these stars have a fairly non-variable light curve as observed from the ground, the spectral types imply that they are likely to show millimag-level variations due to intrinsic variability such as that reported by Buysschaert et al. (2017) or Ramiamanantsoa et al. (2014). These stars are likely included in our photometric data as they lie within 3–4 arcmin of  $\eta$  Car. However, it is difficult to see

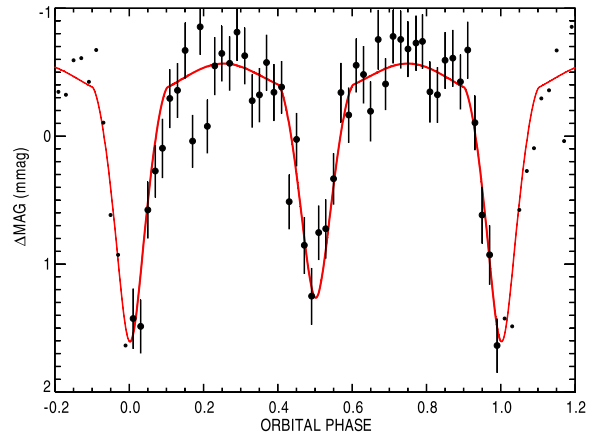

**Figure 3.** The derived light curve of CPD  $-59^\circ 2628$  after heavily detrending the light curve of  $\eta$  Car, including a Wilson–Devinney model based upon the orbital parameters presented by Freyhammer et al. (2001). The model was scaled to the observed variations to account for the heavy contamination from the surrounding stars. See the text for further details.

directly if their flux lies within the PSF due to the relative faintness of these objects for the *BRITE* satellites.

One of the stars within the *BRITE*-Constellation PSF for  $\eta$  Car is CPD  $-59^\circ 2628$  (V573 Carinae), which was discovered by Freyhammer et al. (2001) to be an eclipsing binary based on the long-term monitoring of  $\eta$  Car reported by van Genderen et al. (1995) and Sterken et al. (1996). The period of the binary is 1.469 332 d (Freyhammer et al. 2001), and the eclipse depths are nearly 0.5 mag in  $y$ -band photometry, and both the primary and secondary eclipses are similar in depth. We see evidence for this variability (at the half period,  $f = 1.36$  cycles d<sup>-1</sup>) in our Fourier amplitude spectrum of  $\eta$  Car, which we marked with an arrow in the large panel on the right hand of Fig. 2.

We were able to retrieve the light curve of the eclipsing binary through a careful de-trending of the light curve. Knowing the period of the binary (1.469 d) from the ephemeris reported by Freyhammer et al. (2001), we did an averaging for each point across the orbital period of CPD  $-59^\circ 2628$ . Then, we did a phase-averaging of the data in order to improve the detection of the eclipsing light curve. Fig. 3 shows the data binned with  $\sim 0.02$  in phase. We also overplot a model of the system using a Wilson–Devinney code (Wilson & Devinney 1971) and the orbital parameters from Freyhammer et al. (2001) that was scaled to match the derived light curve from *BRITE*. The period derived from our data is of lower quality than that of Freyhammer et al. (2001), but our time of minimum is HJD 2457707.9714  $\pm$  0.0040, with a phase offset of only  $+0.0036 \pm 0.0040$  compared to the prediction of Freyhammer et al. (2001). These results all show that the model and ephemeris of Freyhammer et al. (2001) remains accurate, and that our techniques yield high-quality results.

Given the large number of nearby sources, we expect that the amplitudes of the pulsational signals found in the previous section will be lower than if the system were well-isolated and free of the Homunculus nebula. However, because of contamination the depth of the eclipse of CPD  $-59^\circ 2628$  is only  $\sim 0.5$  per cent of that observed by Freyhammer et al. (2001), which did not have the same level of contamination as these observations. Most likely, this system has the largest effect on the light curve of  $\eta$  Car. As such, the periodic photometric oscillations we detected with 2-mmag amplitudes would have to have an amplitude  $>0.5$  mag

if they originate in a field star instead of  $\eta$  Car. Among O-type stars, only eclipsing binaries are seen to have such large photometric amplitudes. Contamination can be an important issue with these *BRITE*-Constellation data. However, it also shows that the small satellites can provide useful information for some stars that are as faint as  $V = 10$ .

## 5 DISCUSSION

We have identified two independent frequencies listed in Table 1 in the  $\eta$  Car system through high-precision photometric time series collected with *BRITE*. Additional frequencies, which are currently less than four-times the noise floor in significance, may become reliably detectable in subsequent high-precision photometric studies. The variability could also come from re-processed light from the primary in regions such as the Weigelt knots or wind collision zone. If the secondary contributes 2 per cent of the light at these wavelengths, which is a conservative upper limit from interferometric techniques, then the pulsations ascribed to these frequencies would have photometric amplitudes corresponding to 10 per cent of the star's luminosity. From the constraints on the secondary from analysis of the Weigelt knots surrounding  $\eta$  Car (Mehner et al. 2010a), the companion must be an early O star or WR star. As such a level of photometric variability from pulsations has not been observed in O stars (e.g. Walker et al. 2005; Pablo et al. 2017) or WR stars (e.g. Lefèvre et al. 2005; Moffat et al. 2008), it is reasonable to associate the oscillations with the primary star in the  $\eta$  Car system, and not the secondary star or the contaminating O stars mentioned in the previous section.

$\eta$  Car was previously studied photometrically by van Genderen et al. (1995) and Sterken et al. (1996), who discovered a 58.58 d periodicity. This time-scale is the same as our derived frequency  $f_1$ . van Genderen et al. (1995) and Sterken et al. (1996) found this oscillation to be relatively stable in frequency for over two decades of monitoring with Strömgren and Johnson photometry, and attributed it to pulsations. They did find that the amplitude of this pulsation was variable, caused by a decades-long beating effect with a 59.1 d period. Our data show that  $f_1$  has an amplitude of 2.64 mmag, whereas the discovery of this period showed an amplitude of 35 mmag. However, there are some very important differences in these data. Our data include the entire Homunculus nebula (as did the data in van Genderen et al. 1995; Sterken et al. 1996), which can contribute a larger amount of flux in the  $R$ -band than in the previous analyses; although, the exact contribution has not been measured precisely in recent years due to the continuing brightening of  $\eta$  Car making such a measurement impossible to do with *HST*. Further, the  $R$ -band is also contaminated by  $H\alpha$ , which contains emission from the primary's stellar wind and the wind-wind collision zone. Neither the contamination by the Homunculus nor by  $H\alpha$  can be easily corrected, but recent spectra by Richardson et al. (2016b) show that the  $H\alpha$  contribution is at least 35–40 per cent of the observed light in the *BRITE* red filter near apastron, corresponding approximately to the orbital phase of the *BRITE* photometry reported here. We show a sample spectrum of the central region of the  $\eta$  Car system along with the *BRITE*-Constellation response filter in Fig. 4.

We suspect that the dilution of the pulsational amplitude by the neighbouring stars, Homunculus, and the strong  $H\alpha$  emission line may indicate that the pulsation has been stable for several decades. In fact, our derived times of maxima from the frequencies in Table 1 are within a few days of the times of maxima reported in these previous studies. Given the similarity of our results to those of Sterken et al. (1996) despite two different techniques being utilized,

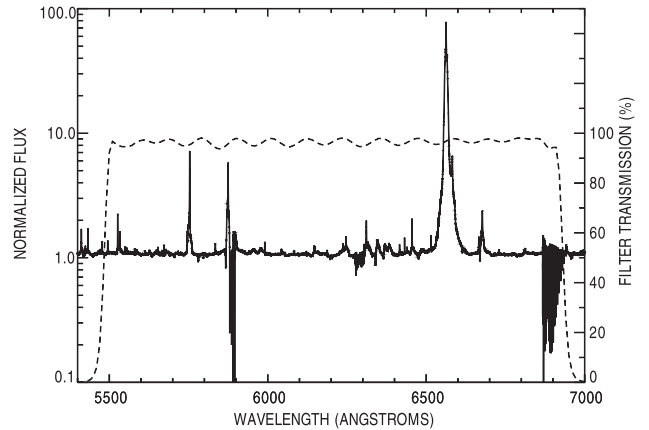

**Figure 4.** A spectrum of  $\eta$  Car taken near apastron from Richardson et al. (2016a) is shown with the *BRITE*-Constellation red filter transmission curve. The strong  $H\alpha$  profile dominates this portion of the spectrum, which is why the y-axis is shown in logarithmic units. The contribution of  $H\alpha$  is typically between 35 and 40 per cent of the light recorded by *BRITE*-Constellation, with additional contamination from the Homunculus nebula.

we should ask what the source of potentially coherent oscillations in the extreme primary star is. Sterken et al. (1996) found that the primary pulsation period of 58.58 d showed a beat period of  $\sim 20$  yr against a secondary period of  $\sim 59.1$  d, which causes the observed photometric amplitude to vary. A secondary Fourier peak appears in the Fourier spectrum at a lower frequency than  $f_1$ , but would imply a beating period closer to 40 d after the removal of the frequencies  $f_1$  and  $f_2$ . This frequency could also be emerging due to changes in the amplitude or phase of the signal. Future monitoring with *BRITE* may provide insights into the reality of the two similar frequencies and any beat frequencies in the data as our combined data set shows two emerging peaks in the region surrounding  $f_1$  in the Fourier amplitude spectrum. A similar frequency spacing was resolved for *BRITE*-Constellation observations of HD 201433 through the addition of photometric data from another satellite (Kallinger et al. 2017). We are hopeful that additional seasons of observations will elucidate these details in  $\eta$  Car.

The only similar star that has shown stable pulsations is the LBV candidate MWC 314 (Richardson et al. 2016a), which exhibits two pulsations with periods close to 1 d. This star has a spectrum reminiscent of the LBVs like  $\eta$  Car, but many of the emission lines are double-peaked, forming in a circumbinary disc. In the case of MWC 314, Richardson et al. (2016a) found that the binary was not a massive LBV as previously suggested by Muratorio, Rossi & Friedjung (2008) and Lobel et al. (2013), but rather was the evolutionary byproduct of a lower mass binary interaction. The system was a close spectroscopic twin to the binary HDE 326823 (Richardson, Gies & Williams 2011) where mass transfer has hidden the mass gainer behind a thick accretion torus while leaving the lower mass donor star visible. The analysis presented by Richardson et al. (2016a) of MWC 314 showed that if the stars are rotating synchronously at periastron, then the mass of the primary is only 5–6  $M_{\odot}$ . A second model, involving boosting the eccentricity of an orbit during mass transfer, showed the primary mass of MWC 314 was  $\sim 14 M_{\odot}$ . The pulsational behaviour of MWC 314 that was observed with *MOST* confirmed the low-mass nature of this system (Richardson et al. 2016a). Similar short-period ( $\sim 6$  h) pulsations were observed in the HD 5980 system by Sterken & Breysacher (1997) after its LBV-like eruption, but the close orbit likely changes the observed stellar structure of these stars compared

to other LBV stars. Similar coherent short-period time-scales are not seen in the light curve of  $\eta$  Car.

Current models of  $\eta$  Car have a primary star weighing  $\sim 90 M_{\odot}$  with a secondary mass of  $\sim 30 M_{\odot}$  (Groh et al. 2012). These models have been used to self-consistently interpret high resolution, spatially resolved spectroscopy with *HST/STIS* (Madura et al. 2013; Gull et al. 2016), the variability from the X-ray light curve (Corcoran et al. 2017), the variations from the colliding winds as observed with the He II  $\lambda 4686$  Å emission line (Teodoro et al. 2016), and in variability from the He I P Cygni absorption troughs (Richardson et al. 2016b). The main constraints on the masses come from mass-luminosity relationships, though the luminosities are difficult to determine for  $\eta$  Car given the circumstellar environment (e.g. Morris et al. 2017).

The two apparently coherent oscillations detected by *BRITE* could represent strange-mode pulsations that are expected to be the primary pulsations for stars that have gone through a red supergiant phase (Saio, Georgy & Meynet 2013). LBVs have been observed to have non-periodic variations in their photometry lasting decades (Humphreys & Davidson 1994) and these are thought to be driven by either an enhanced  $\kappa$ -mechanism or strange-mode oscillation which can account for many of the observed time-scales in LBVs and in normal supergiants (Saio et al. 2013). However,  $\eta$  Car represents one of the most luminous stars in the Galaxy and our understanding of stellar evolution suggests that such massive stars do not pass through the red supergiant phase.

Lamers et al. (1998) examined the variability of several LBVs and found that the microvariability may be explained by  $g$ -modes. They found periods ranging between 18 and 195 d, but all periods showed large changes over time-scales of a few hundred days. Given the time sampling of the *BRITE*-Constellation photometry,  $f_1$  may have been stable for many decades (van Genderen et al. 1995; Sterken et al. 1996). We also note that van Genderen et al. (1999) found evidence of a 200 d time-scale in the photometric behaviour of  $\eta$  Carinae, but our current *BRITE*-Constellation photometric data set has too short a time-span to examine the behaviour at that time-scale.

However, neither strange-modes nor  $g$ -modes in LBVs have been shown to be stable in the Fourier domain over long time-scales. Therefore, the most probable source of these oscillations may be tidally excited oscillations (TEOs), which seems plausible given our derived periods. While there has never been a system with such a long orbital period which has exhibited TEOs,  $\eta$  Car also has an unusually high eccentricity, and masses. It is reasonable to suspect that these possible pulsations are TEOs as seen in several ‘heartbeat’ systems (e.g. Guo, Gies & Fuller 2017), even though they are observed far from the periastron event.

TEOs were first suggested by Cowling (1941) but not observed until recently (Handler et al. 2002; Maceroni et al. 2009). The analysis of TEOs became prominent with the advent of *Kepler* observations (e.g. Shporer et al. 2016, and references therein). Recent advances have provided a means to identify the geometry of the pulsational modes observed in these eccentric binaries (O’Leary & Burkart 2014; Guo et al. 2017). In Table 1, we include potential harmonics to the 2022.7 d orbital period (best derived recently by Teodoro et al. 2016) of  $\eta$  Car. The identified modes all seem to have many potential orbital harmonics associated with them within the errors of the frequencies. The tidal driving of these modes is discussed from a theoretical standpoint by Kumar et al. (1995), with some of the clearest detections shown in the work by Thompson et al. (2012).

The most massive confirmed heartbeat system is  $\iota$  Ori (Pablo et al. 2017), which shows evidence for TEOs excited at five harmonics. The orbital harmonics at which these pulsations are observed are

23, 25, 27, 33, and 75. In the case of  $\eta$  Car, we would infer higher order harmonics, with the exception of  $f_2$  in Table 1, which is near the 35th orbital harmonic of this system. The orbital period of  $\eta$  Car is also much longer than that of  $\iota$  Ori (2022.7 d compared to 29.1 d), which, combined with the differing masses, might change the excited pulsational modes. If these are indeed TEOs, then  $\eta$  Car would exhibit both the longest known period for TEOs and would likely be the highest mass system to exhibit the phenomenon thus far.

Lastly, a massive binary in the Large Magellanic Cloud, R 81, contains a candidate LBV in a 78.5 d orbit that was characterized by Tubbesing et al. (2002). The orbit is fairly eccentric ( $e = 0.569$ ) and shows photometric modulation around the orbit, with a possible eclipse in the system. Tubbesing et al. (2002) also found some relatively stable pulsations which have a period of 10.78 d, which are seen both photometrically and spectroscopically. The periods are a 7:1 harmonic of the orbital period, within the errors of both time-scales measured. While the mass loss rate and terminal velocity are lower for R 81 than for  $\eta$  Carinae, this may represent another massive system with a heartbeat and TEOs. This system would be the best analog for  $\eta$  Car if the pulsations discussed here are actually excited by the eccentric binary orbit.

We tested our hypothesis of the TEOs using the TIDES code (Moreno & Koenigsberger 1999; Moreno et al. 2011). The calculations assumed masses similar to those of most modern simulations of the system (Madura et al. 2013), namely the primary star had a mass of  $100 M_{\odot}$  and a radius of  $90 R_{\odot}$ , with the secondary star having a mass of  $30 M_{\odot}$ . One parameter used in these simulations is the ratio of the rotation period of the primary star to the instantaneous circular orbital period at periastron. For these first calculations, we use a ratio of the two of 0.464, i.e. the star is rotating at 46 per cent the rate of the orbit at periastron. This synchronicity parameter was calculated from the orbital period, eccentricity, and an assumed radius ( $R_p = 100 R_{\odot}$ ) and a rotational speed of  $50 \text{ km s}^{-1}$ . The uncertainty in the rotational speed is quite high, but some results indicate that the primary could be a rapid rotator (e.g. Smith et al. 2003; Groh et al. 2010). We want to further test models for the system once better constraints on the pulsational periods are derived from future *BRITE* data along with improvements on the orbital period from new measurements across the 2020 periastron passage. The results of the calculations are the radius as a function of orbital phase. We used this with the Stefan–Boltzmann law with  $T_{\text{eff}} = 27,500 \text{ K}$  to derive a light curve for the same orbital phase range as our *BRITE* observations. Our effective temperature is from the models of Hillier et al. (2001) and represents the base of the wind, but effective temperature is not an easily defined quantity for this system.

From this simulated light curve, we extracted the portion from the same orbital phase range as these *BRITE* measurements. We de-trended the light curve in the same manner as the data reduction from the observations, and then calculated the Fourier amplitude spectrum of the simulated light curve. We scaled the Fourier transform to match the intensity of the strongest peaks in Fig. 2, shown as a blue line. The resulting Fourier analysis shows similar peaks as our derived  $f_1$  and  $f_2$  from *BRITE*. While the parameters of this specific simulation were not fine-tuned to our frequencies, they nevertheless show that interpreting the observed pulsations as TEOs is plausible, and that further observations with the *BRITE* nanosatellites will provide more precise pulsational frequencies, thus allowing us to fine-tune a model to derive fundamental parameters of the system. This interpretation provides a natural explanation for the long-lived nature of  $f_1$  that was first reported from data collected more than two decades ago (van Genderen

et al. 1995; Sterken et al. 1996). Since our times of maxima seem to coincide with those of the previous studies, we suspect these modes to be tidally excited. We did not run a large grid of models to explore what frequencies and amplitudes are predicted for various values of rotation, radii, and masses. Our future analyses that incorporate more photometric data will provide a better data set in which to model these pulsational frequencies.

We have begun planning observations to confirm these oscillations and refine the periods with *BRITE*-Constellation and to examine the possibility of TEOs being the driving cause of this variability. We will also be working on obtaining high-quality spectroscopy of the system across the red filter from *BRITE*. This should confirm if the driving cause is from the continuum or the wind lines. Further, we will produce a refined set of models with the TIDES code (Moreno & Koenigsberger 1999; Moreno et al. 2011) to constrain the fundamental parameters. With detailed modelling and observations, we will hopefully have a refined set of fundamental parameters. With accurate parameters from asteroseismology, we will begin to understand the evolution of the system.

## ACKNOWLEDGEMENTS

This work is based on data collected by the *BRITE*-Constellation satellite mission, designed, built, launched, operated, and supported by the Austrian Research Promotion Agency (FFG), the University of Vienna, the Technical University of Graz, the Canadian Space Agency (CSA), the University of Toronto Institute for Aerospace Studies (UTIAS), the Foundation for Polish Science & Technology (FNiTP MNiSW), and National Science Centre (NCN). The operation of the Polish *BRITE* satellites is funded by a SPUB grant by the Polish Ministry of Science and Higher Education (MNiSW). NDR acknowledges postdoctoral support by the University of Toledo and by the Helen Luedtke Brooks Endowed Professorship, along with support of NASA grant #78249. GK acknowledges support from CONACYT grant 252499. APi acknowledges support from the NCN grant no. 2016/21/B/ST9/01126. AFJM is grateful for financial aid from NSERC (Canada) and FQRNT (Quebec). AD is supported by FAPESP Foundation. GH acknowledges support by the Polish National Science Center (NCN), grant no. 2015/18/A/ST9/00578. APO acknowledges NCN grant 2016/21/D/ST9/00656. GAW acknowledges Discovery Grant support from NSERC. WW was supported by the Austrian Research Promotion Agency (FFG). KZ acknowledges support by the Austrian Fonds zur Förderung der wissenschaftlichen Forschung (FWF, project V431-NBL) and the Austrian Space Application Programme (ASAP) of the Austrian Research Promotion Agency (FFG).

## REFERENCES

Buyschaert B. et al., 2017, *A&A*, 602, A91  
 Corcoran M. F., Ishibashi K., Swank J. H., Petre R., 2001, *ApJ*, 547, 1034  
 Corcoran M. F. et al., 2017, *ApJ*, 838, 45  
 Cowling T. G., 1941, *MNRAS*, 101, 367  
 Daminieli A., 1996, *ApJ*, 460, L49  
 Daminieli A., Conti P. S., Lopes D. F., 1997, *New A*, 2, 107  
 Daminieli A. et al., 2008, *MNRAS*, 386, 2330  
 Davidson K., 1997, *New A*, 2, 387  
 Davidson K., Ishibashi K., Martin J. C., 2017, *Res. Notes Am. Astron. Soc.*, 1, 6  
 Fernández-Lajús E. et al., 2010, *New A*, 15, 108  
 Freyhammer L. M., Clausen J. V., Arentoft T., Sterken C., 2001, *A&A*, 369, 561  
 Gabriel A. H. et al., 2002, *A&A*, 390, 1119  
 Gaviola E., 1953, *ApJ*, 118, 234

Groh J. H., Madura T. I., Owocki S. P., Hillier D. J., Weigelt G., 2010, *ApJ*, 716, L223  
 Groh J. H., Hillier D. J., Madura T. I., Weigelt G., 2012, *MNRAS*, 423, 1623  
 Gull T. R. et al., 2016, *MNRAS*, 462, 3196  
 Guo Z., Gies D. R., Fuller J., 2017, *ApJ*, 834, 59  
 Handler G. et al., 2002, *MNRAS*, 333, 262  
 Hillier D. J., Davidson K., Ishibashi K., Gull T., 2001, *ApJ*, 553, 837  
 Humphreys R. M., Davidson K., 1994, *PASP*, 106, 1025  
 Kallinger T. et al., 2017, *A&A*, 603, A13  
 Kaper L., Henrichs H. F., Nichols J. S., Snoek L. C., Volten H., Zwarthoed G. A. A., 1996, *A&AS*, 116, 257  
 Kumar P., Ao C. O., Quataert E. J., 1995, *ApJ*, 449, 294  
 Lamers H. J. G. L. M., Bastiaanse M. V., Aerts C., Spoon H. W. W., 1998, *A&A*, 335, 605  
 Lefèvre L. et al., 2005, *ApJ*, 634, L109  
 Lenz P., Breger M., 2005, *Comm. Asteroseismol.*, 146, 53  
 Lobel A. et al., 2013, *A&A*, 559, A16  
 Maceroni C. et al., 2009, *A&A*, 508, 1375  
 Madura T. I., Owocki S. P., 2010, *Revista Mexicana de Astronomia y Astrofísica Conference Series*, Astronomical Institute, Mexico, p. 52  
 Madura T. I. et al., 2013, *MNRAS*, 436, 3820  
 Mehner A., Davidson K., Ferland G. J., Humphreys R. M., 2010a, *ApJ*, 710, 729  
 Mehner A., Davidson K., Humphreys R. M., Martin J. C., Ishibashi K., Ferland G. J., Walborn N. R., 2010b, *ApJ*, 717, L22  
 Mehner A., Davidson K., Humphreys R. M., Ishibashi K., Martin J. C., Ruiz M. T., Walter F. M., 2012, *ApJ*, 751, 73  
 Moffat A. F. J. et al., 2008, *ApJ*, 679, L145  
 Moreno E., Koenigsberger G., 1999, *RMxAA*, 35, 157  
 Moreno E., Koenigsberger G., Harrington D. M., 2011, *A&A*, 528, A48  
 Morris P. W., Gull T. R., Hillier D. J., Barlow M. J., Royer P., Nielsen K., Black J., Swinyard B., 2017, *ApJ*, 842, 79  
 Muratorio G., Rossi C., Friedjung M., 2008, *A&A*, 487, 637  
 O’Leary R. M., Burkart J., 2014, *MNRAS*, 440, 3036  
 Pablo H. et al., 2016, *PASP*, 128, 125001  
 Pablo H. et al., 2017, *MNRAS*, 467, 2494  
 Popowicz A., 2016, *Proc. SPIE*, 9904, 99041R  
 Popowicz A. et al., 2017, *A&A*, 605, A26  
 Ramiaramanantsoa T. et al., 2014, *MNRAS*, 441, 910  
 Ramiaramanantsoa T. et al., 2018, *MNRAS*, 473, 5532  
 Richardson N. D., Gies D. R., Williams S. J., 2011, *AJ*, 142, 201  
 Richardson N. D. et al., 2016a, *MNRAS*, 455, 244  
 Richardson N. D. et al., 2016b, *MNRAS*, 461, 2540  
 Saio H., Georgy C., Meynet G., 2013, in Shibahashi H., Lynas-Gray A. E., eds, *ASP Conf. Ser. Vol. 479, Progress in Physics of the Sun and Stars: A New Era in Helio- and Asteroseismology*. Astron. Soc. Pac., San Francisco, p. 47  
 Sana H. et al., 2012, *Science*, 337, 444  
 Shporer A. et al., 2016, *ApJ*, 829, 34  
 Smith N., Frew D. J., 2011, *MNRAS*, 415, 2009  
 Smith N., Davidson K., Gull T. R., Ishibashi K., Hillier D. J., 2003, *ApJ*, 586, 432  
 Sterken C., Breysacher J., 1997, *A&A*, 328, 269  
 Sterken C., de Groot M. J. H., van Genderen A. M., 1996, *A&AS*, 116, 9  
 Teodoro M. et al., 2016, *ApJ*, 819, 131  
 Thompson S. E. et al., 2012, *ApJ*, 753, 86  
 Tubbesing S. et al., 2002, *A&A*, 389, 931  
 van Genderen A. M. et al., 1995, *A&A*, 304, 415  
 van Genderen A. M., Sterken C., de Groot M., Burki G., 1999, *A&A*, 343, 847  
 Walker G. A. H. et al., 2005, *ApJ*, 623, L145  
 Weiss W. W. et al., 2014, *PASP*, 126, 573  
 Welsh W. F. et al., 2011, *ApJS*, 197, 4  
 Whitelock P. A., Feast M. W., Marang F., Breedt E., 2004, *MNRAS*, 352, 447  
 Wilson R. E., Devinney E. J., 1971, *ApJ*, 166, 605

This paper has been typeset from a  $\text{\TeX}/\text{\LaTeX}$  file prepared by the author.
